# Supplementary material
Source: publisher figshare collection journal article supplement (https://acs.figshare.com/ndownloader/files/4668244)

## Supplementary Information

**Original (unfiltered)  $k^3 \cdot \chi(k)$  functions (left) of  $Y_5O(O^iPr)_{13}$  (top),  $Y(acac)_3 \cdot 3H_2O$  (middle) and  $Y(OEtOMe)_3$  in 2-methoxyethanol (bottom), together with the Fourier transformed functions (right).**

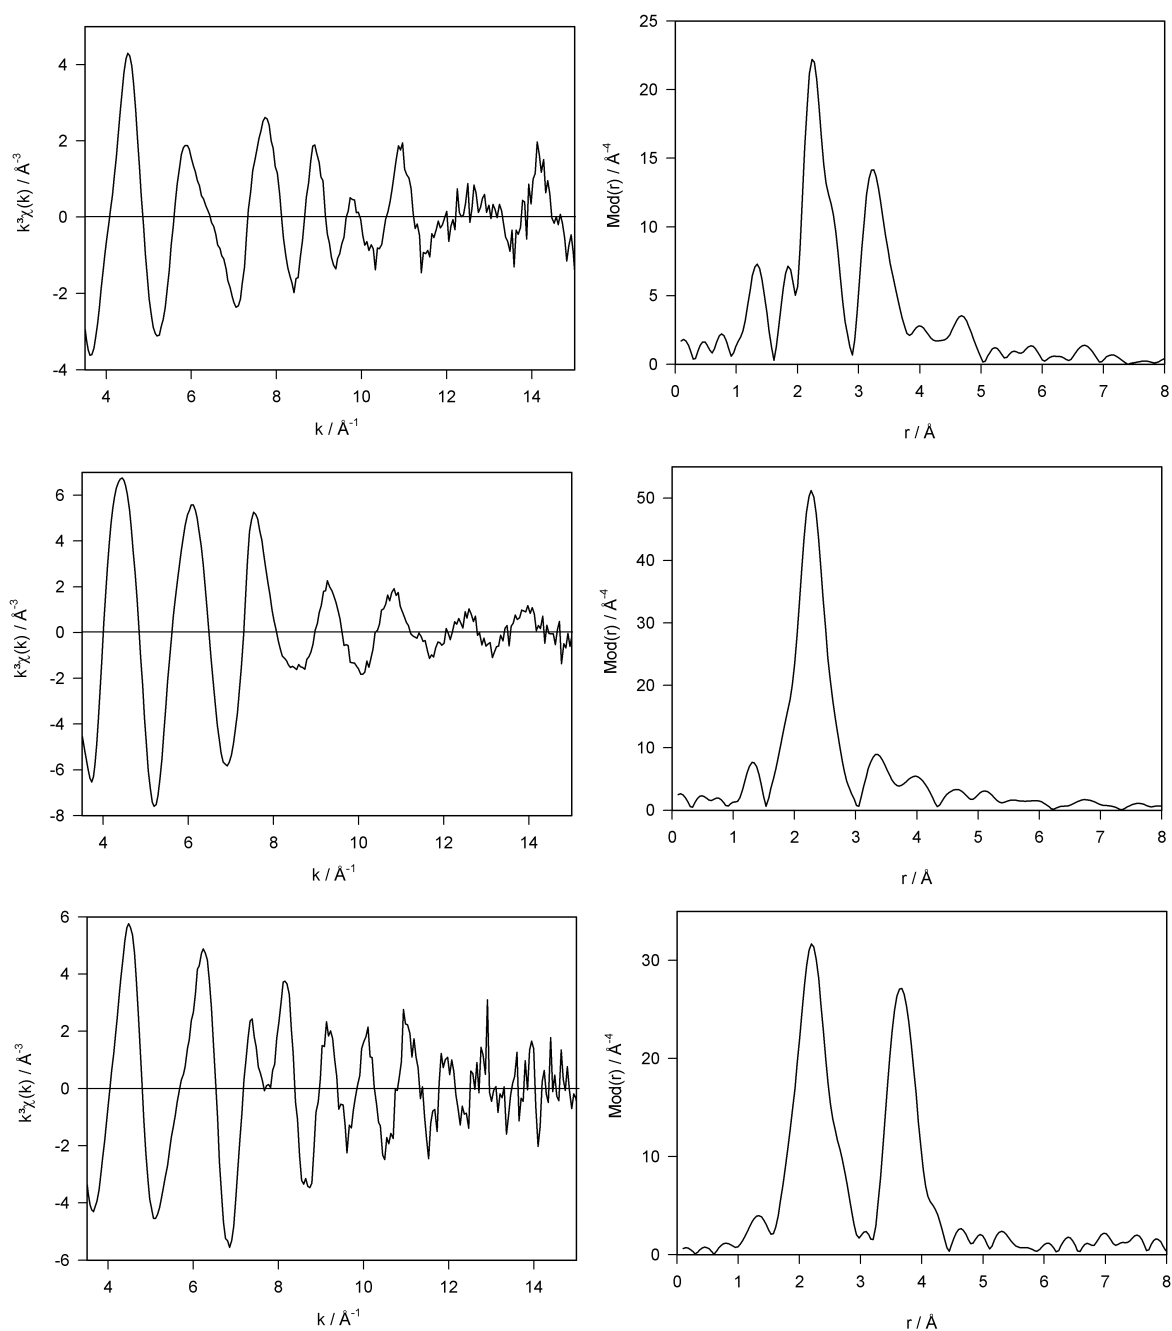

Supplement: Supplementary file 1 [file 4668244]
